# Supplementary material
Source: PubMed Central journal article supplement (PMC11114627)
Supplement: NIHMS1990424-supplement-video_legends.pdf [file NIHMS1990424-supplement-video_legends.pdf]

**Movie S1.**

Example time lapse images of HEK293 cells expressing WT in response to EA1 stimulation.  
Significant cell rounding was observed.

5 **Movie S2.**

Example time lapse images of HEK293 cells expressing FN2 in response to EA1 stimulation.  
Significant cell rounding was observed.

**Movie S3.**

10 Example time lapse images of HEK293 cells expressing LS in response to EA1 stimulation. No  
cell rounding was observed.

**Movie S4.**

15 Example time lapse images of HEK293 cells expressing pBabe vector in response to EA1  
stimulation. No cell rounding was observed.
